# Supplementary material for: Increased genetic variation of bovine viral diarrhea virus in dairy cattle in Poland
Source: PubMed Central journal article supplement (PMC6683398; doi:10.1186/s12917-019-2029-z), 2019-08-05

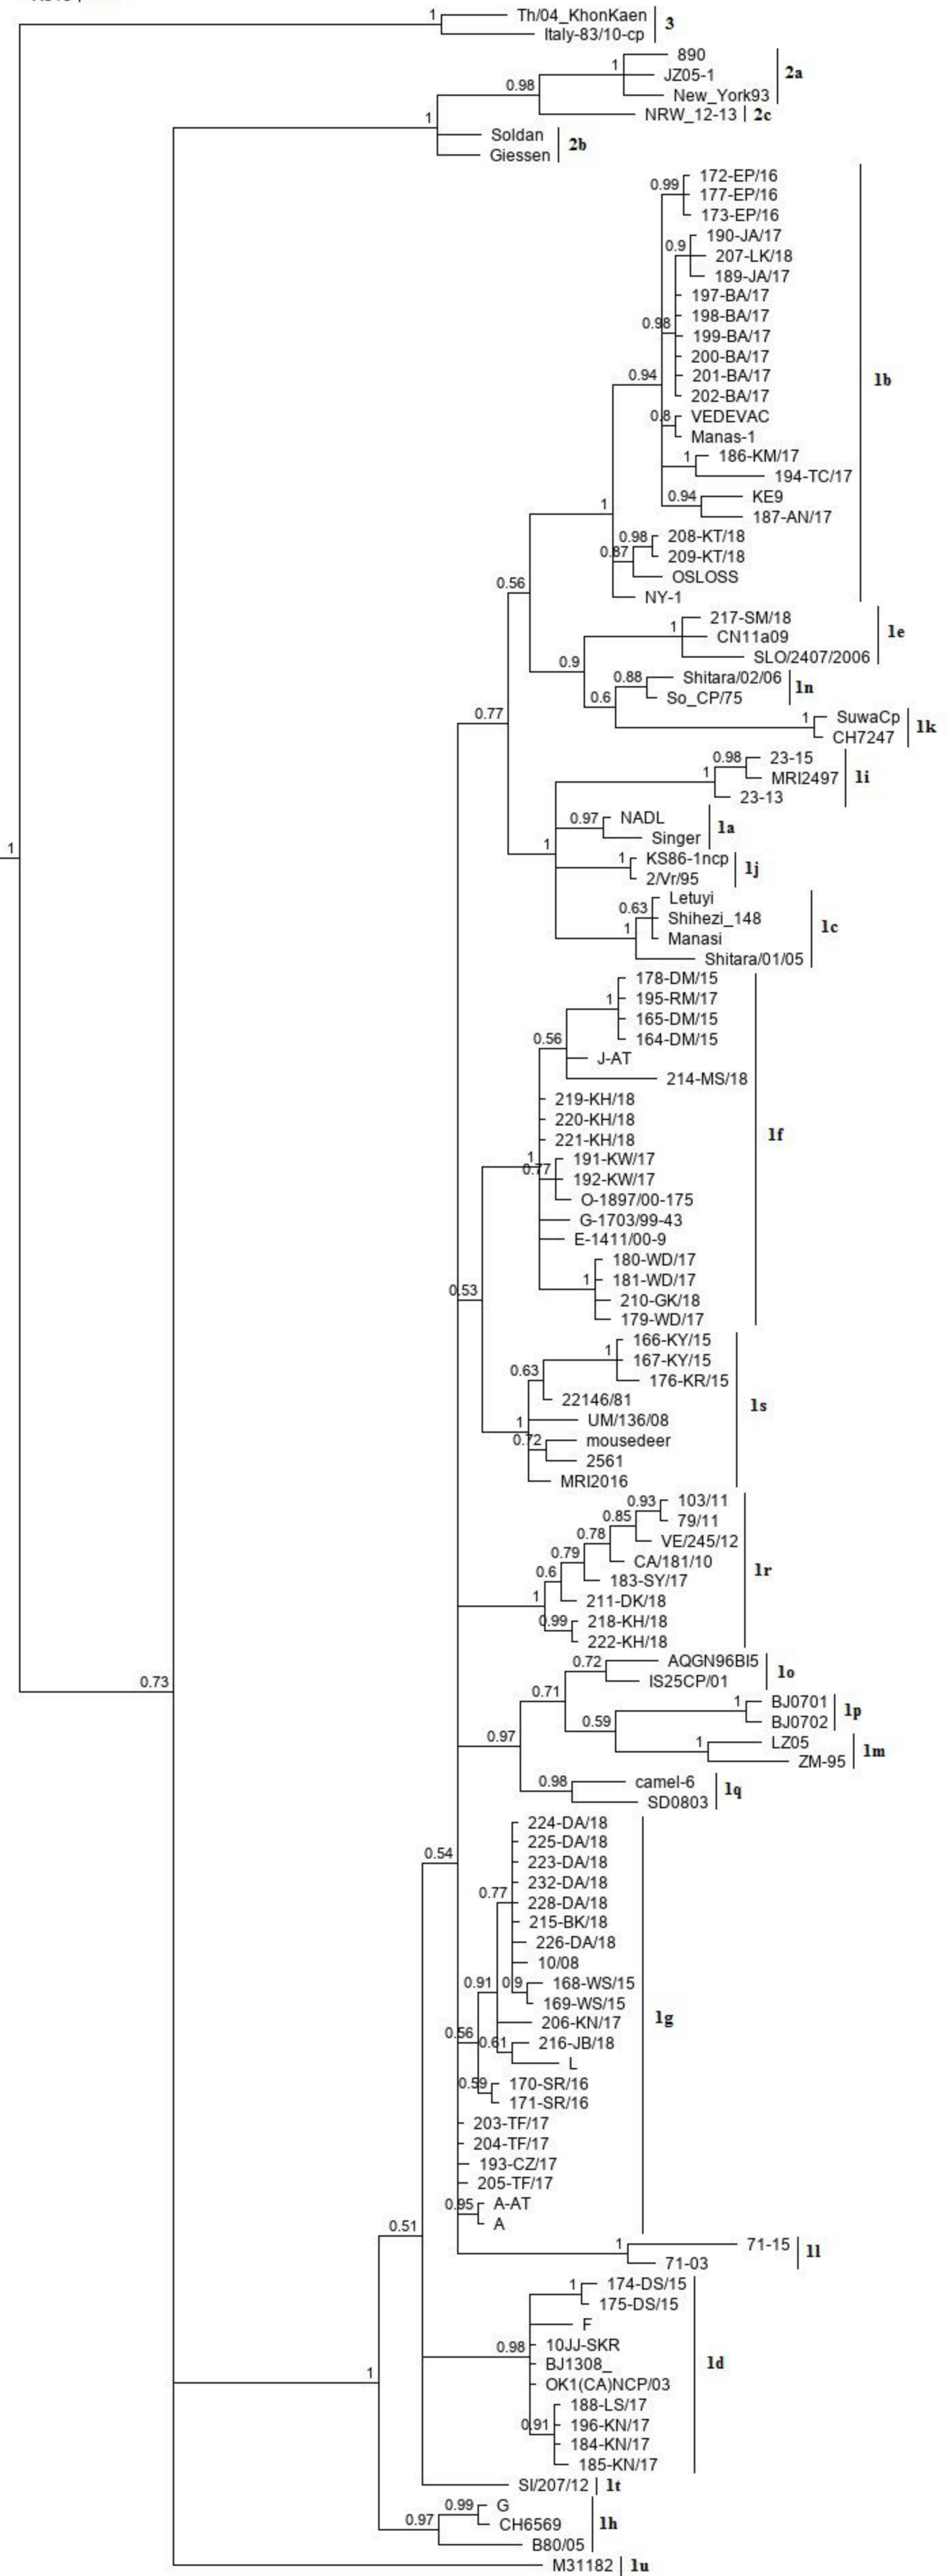

Supplement: 12917_2019_2029_MOESM1_ESM.pdf [file 12917_2019_2029_MOESM1_ESM.pdf]
