# Supplementary material for: Increased genetic variation of bovine viral diarrhea virus in dairy cattle in Poland
Source: PubMed Central journal article supplement (PMC6683398; doi:10.1186/s12917-019-2029-z), 2019-08-05
Supplement: 12917_2019_2029_MOESM2_ESM.pdf [file 12917_2019_2029_MOESM2_ESM.pdf]

0.7 New\_York\_93 | 2a  
JZ05-1  
0.57  
NRW\_12-13 | 2c  
0.67 Hokudai-Lab/09  
0.94 LV60-57-13 | 2b  
Soldan

0.94 189-JA/17  
1 207-LK/18  
1 200-BA/17  
0.64 173-EP/16  
0.51 186-KM/17  
0.99 VEDEVAC | 1b  
0.99 Osloss  
0.68 187-AN/17  
KE9  
0.92 0.99 208-KT/18  
209-KT/18  
NY-1

1 184-KN/17  
1 196-KN/17  
0.73 188-LS/17  
F  
0.92 OK1(CA)NCP/03 | 1d  
0.99 BJ1308  
0.62 10JJ-SKR  
DulanD44

1 164-DM/15  
0.96 195-RM/17  
0.97 214-MS/18  
1 181-WD/17  
213-GK/18  
210-GK/18 | 1f  
191-KW/17

0.97 0.99 W  
0.52 B99/05  
0.71 G-1703/99-43  
J  
0.79 0.94 221-KH/18  
O-1897/00-175

0.55 183-SY/17  
1 211-DK/18  
0.58 79/11  
103/11 | 1r

1 166-KY/15  
0.93 176-KR/15 | 1s  
0.94 UM/136/08  
2561  
0.96 168-WS/15  
1 215-BK/18  
48/08  
0.88 193-CZ/17 | 1g  
0.67 L  
1 216-JB/18  
171-SR/16  
A

1 ZM-95 | 1m  
0.58 XC  
1 BJ0701 | 1p  
1 BJ0702  
0.85 1 IS25CP/01 | 1o  
1 HA2-12

1 camel-6 | 1q  
1 SD0803  
1 G | 1h  
1 CH-95-11

1 23/15 | 1i  
1 2186  
0.78 NADL | 1a  
1 Singer

0.62 0.99 Deer-GB1 | 1j  
KS86-1ncp

0.99 SLO/2407/2006 | 1e  
1 217-SM/18  
1 CH-05-02

1 SuwaCp | 1k  
1 Bohni

1 71-15 | 1l  
1 CH-01-08  
1 Shitara/01/05 | 1c  
1 GS1

1 Shitara/02/06 | 1n  
1 So\_CP/75  
M31182 | 1u  
1 Th/04\_KhonKaen | 3  
1 Italy-83/10-cp

SI/207/12 | 1t
